# Supplementary material for: Fertility rates and the postponement of first births: a descriptive study with Finnish population data
Source: PubMed Central journal article supplement — BMJ Open. 2019 Jan 15;9(1):e026336. doi: 10.1136/bmjopen-2018-026336 (PMC6340426; doi:10.1136/bmjopen-2018-026336), 2019-01-15
Supplement: bmjopen-2018-026336supp003.pdf [file bmjopen-2018-026336supp003.pdf]

**Supplementary table 1** The estimated effect of postponing pregnancy on total fertility rates without delay since 1989 in Finland.

| Year | Childlessness rate in each year in % | The rise in childlessness rate at the age 50 since 1989 in % | TFR* | Estimated TFR Without delay since 1989 | The increase in TFR without delay since 1989 |
|------|--------------------------------------|--------------------------------------------------------------|------|----------------------------------------|----------------------------------------------|
| 1989 | 36.6                                 | -                                                            | 1.71 | -                                      | -                                            |
| 1990 | 36.1                                 | 0.1                                                          | 1.79 | 1.79-1.79                              | 0.00-0.00                                    |
| 1991 | 35.7                                 | 0.2                                                          | 1.80 | 1.80-1.80                              | 0.00-0.00                                    |
| 1992 | 35.2                                 | 0.4                                                          | 1.85 | 1.85-1.86                              | 0.00-0.01                                    |
| 1993 | 34.8                                 | 0.1                                                          | 1.81 | 1.81-1.81                              | 0.00-0.00                                    |
| 1994 | 34.4                                 | 0.4                                                          | 1.85 | 1.85-1.86                              | 0.00-0.01                                    |
| 1995 | 34.1                                 | 0.2                                                          | 1.81 | 1.81-1.81                              | 0.00-0.00                                    |
| 1996 | 33.8                                 | 0.3                                                          | 1.76 | 1.76-1.77                              | 0.00-0.01                                    |
| 1997 | 33.6                                 | 0.7                                                          | 1.75 | 1.76-1.76                              | 0.01-0.01                                    |
| 1998 | 33.4                                 | 0.7                                                          | 1.71 | 1.72-1.72                              | 0.01-0.01                                    |
| 1999 | 33.3                                 | 1.2                                                          | 1.73 | 1.74-1.75                              | 0.01-0.02                                    |
| 2000 | 33.2                                 | 1.4                                                          | 1.73 | 1.74-1.76                              | 0.01-0.03                                    |
| 2001 | 33.1                                 | 1.5                                                          | 1.72 | 1.73-1.75                              | 0.01-0.03                                    |
| 2002 | 32.9                                 | 1.9                                                          | 1.73 | 1.75-1.77                              | 0.02-0.04                                    |
| 2003 | 32.8                                 | 2.3                                                          | 1.76 | 1.78-1.81                              | 0.02-0.05                                    |
| 2004 | 32.7                                 | 2.3                                                          | 1.80 | 1.82-1.85                              | 0.02-0.05                                    |
| 2005 | 32.6                                 | 2.6                                                          | 1.80 | 1.82-1.86                              | 0.02-0.06                                    |
| 2006 | 32.5                                 | 2.6                                                          | 1.84 | 1.86-1.90                              | 0.02-0.06                                    |
| 2007 | 32.5                                 | 2.9                                                          | 1.83 | 1.85-1.89                              | 0.02-0.06                                    |
| 2008 | 32.5                                 | 3.3                                                          | 1.85 | 1.88-1.90                              | 0.03-0.07                                    |
| 2009 | 32.5                                 | 3.4                                                          | 1.86 | 1.89-1.94                              | 0.03-0.08                                    |
| 2010 | 32.5                                 | 3.7                                                          | 1.87 | 1.90-1.95                              | 0.03-0.08                                    |
| 2011 | 32.4                                 | 3.9                                                          | 1.83 | 1.86-1.92                              | 0.03-0.09                                    |
| 2012 | 32.4                                 | 4.8                                                          | 1.80 | 1.84-1.91                              | 0.04-0.11                                    |
| 2013 | 32.4                                 | 4.8                                                          | 1.75 | 1.79-1.85                              | 0.04-0.10                                    |
| 2014 | 32.4                                 | 5.4                                                          | 1.71 | 1.76-1.82                              | 0.05-0.11                                    |
| 2015 | 32.4                                 | 5.7                                                          | 1.65 | 1.70-1.77                              | 0.05-0.12                                    |
| 2016 | 32.5                                 | 6.0                                                          | 1.57 | 1.62-1.69                              | 0.05-0.12                                    |

\*TFR: Total Fertility Rate
