# Supplementary figures and images for: Fertility rates and the postponement of first births: a descriptive study with Finnish population data
Source: PubMed Central journal article supplement — BMJ Open. 2019 Jan 15;9(1):e026336. doi: 10.1136/bmjopen-2018-026336 (PMC6340426; doi:10.1136/bmjopen-2018-026336), 2019-01-15

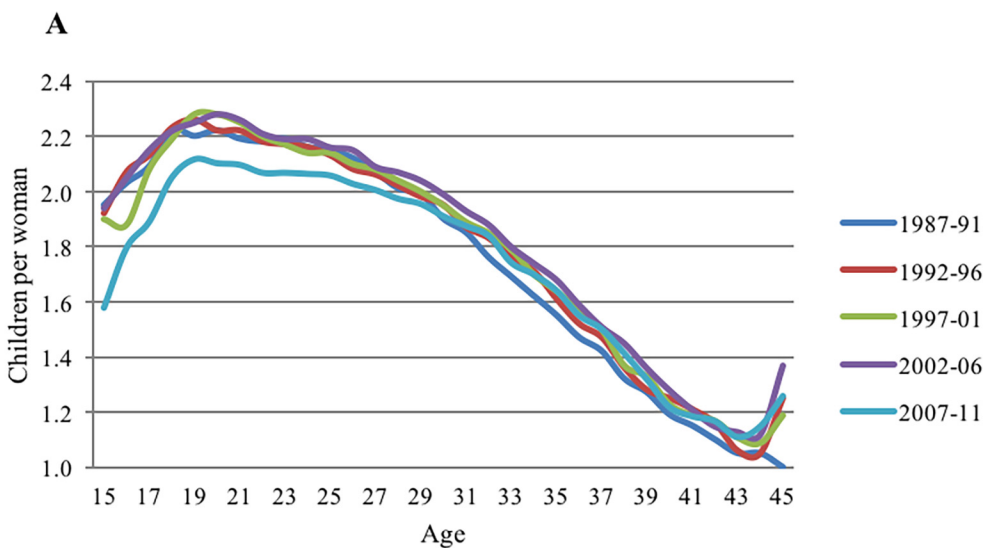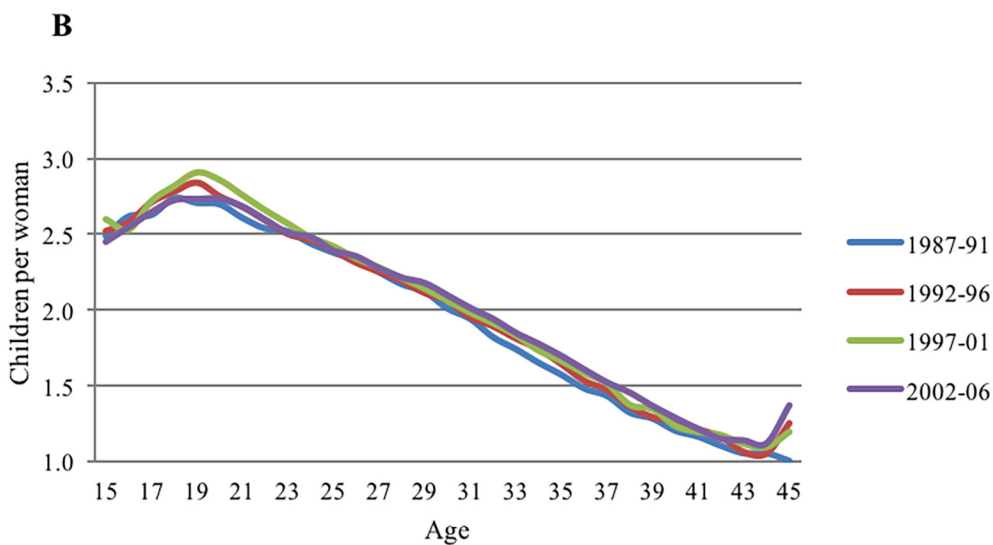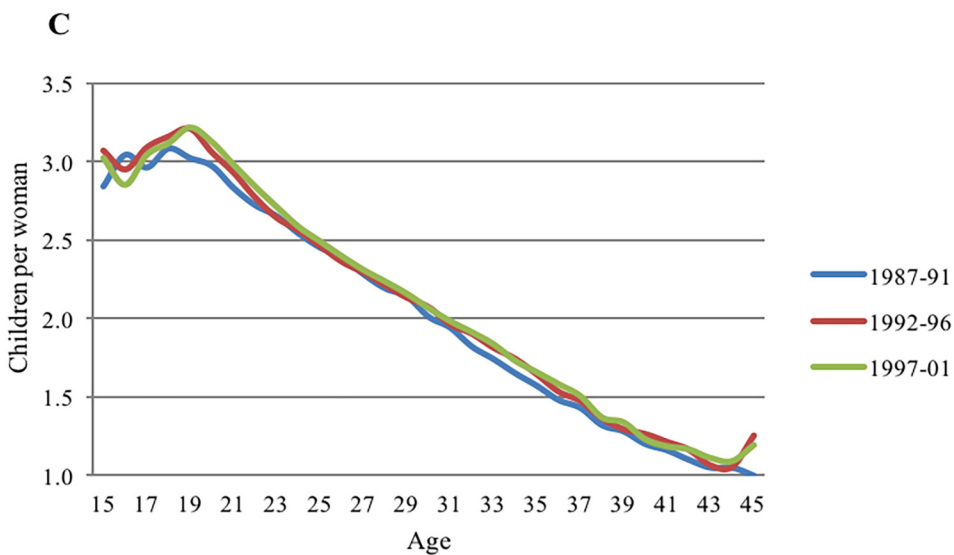

Supplement: bmjopen-2018-026336supp001.pdf [file bmjopen-2018-026336supp001.pdf]

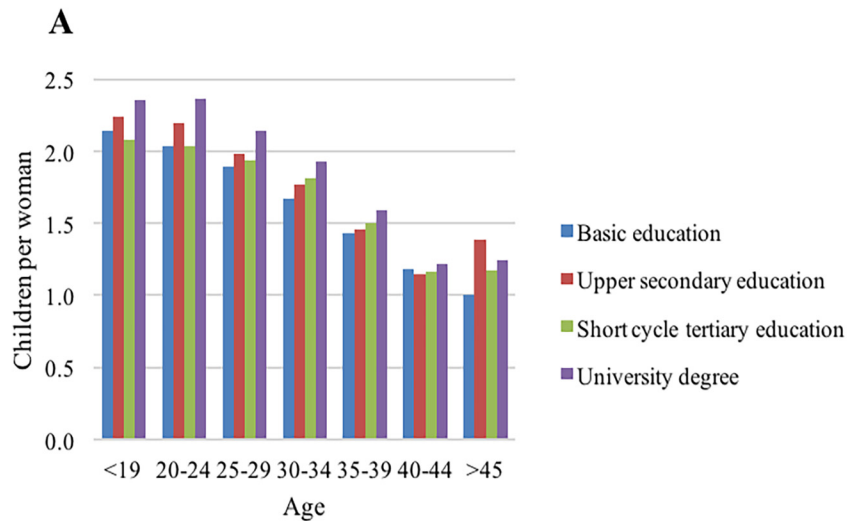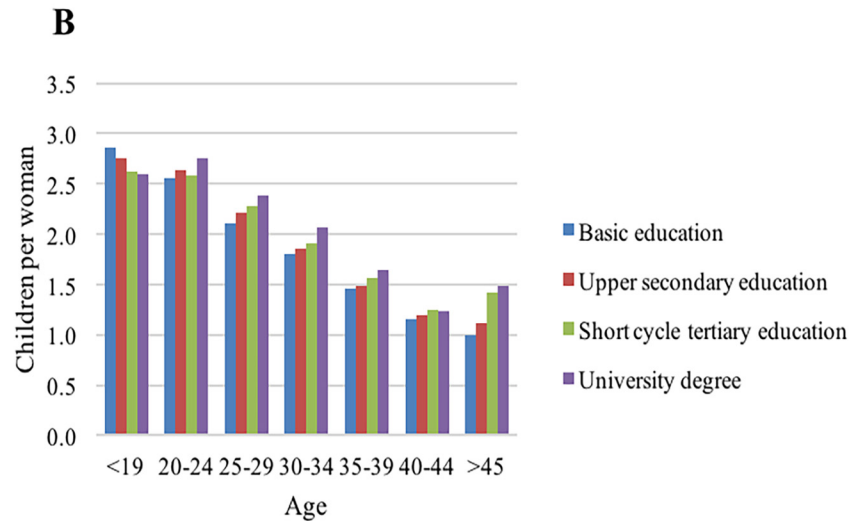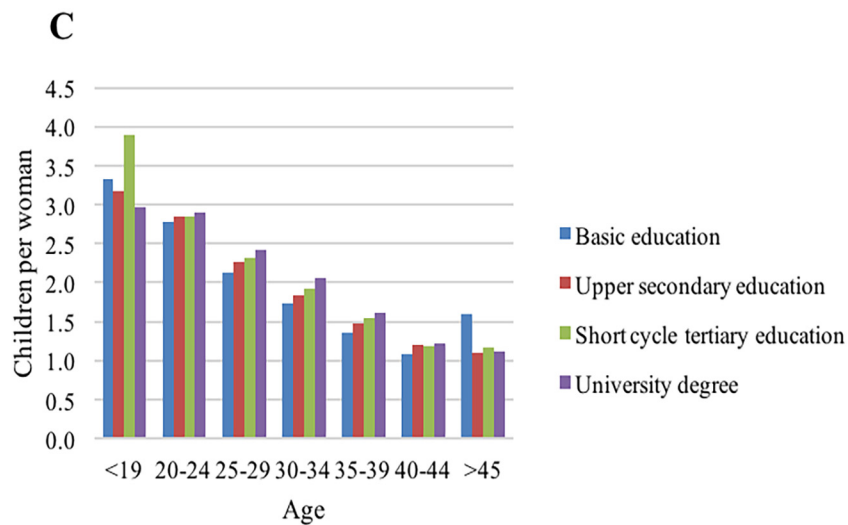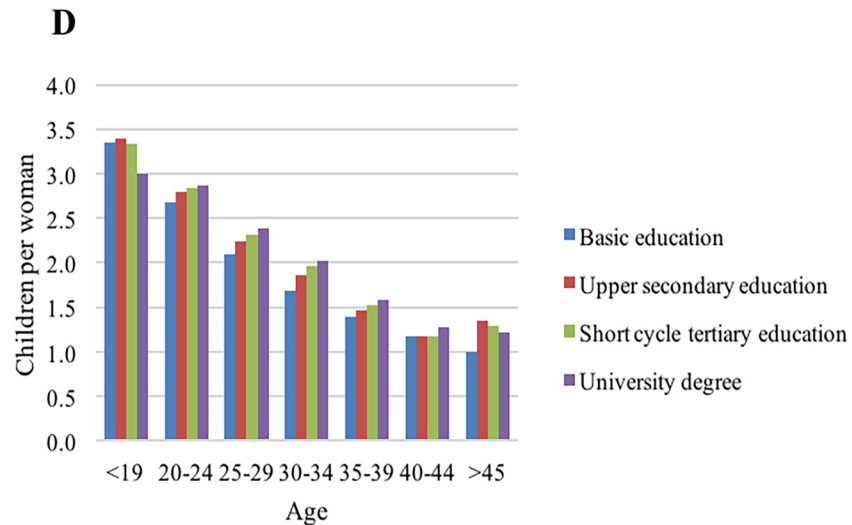

Supplement: bmjopen-2018-026336supp002.pdf [file bmjopen-2018-026336supp002.pdf]
